# Supplementary material for: Goss’s Wilt Resistance in Corn Is Mediated via Salicylic Acid and Programmed Cell Death but Not Jasmonic Acid Pathways
Source: MDPI journal article supplement (doi:10.3390/plants12071475), 2023-03-28
Supplement: s1 [file s1]

**Supplementary Table S1.** Real time RT-PCR primer sequences.

| Gene ID        | Primer              | Sequence                 |
|----------------|---------------------|--------------------------|
| ZM2G153541     | <i>EF1a</i> (S)     | TGGGCCTACTGGTCTTACTACTGA |
|                | <i>EF1a</i> (A)     | ACATACCCACGCTTCAGATCCT   |
| ZM2G067225     | <i>ZmAOS</i> (S)    | CCCAGCGTCGACAACAA        |
|                | <i>ZmAOS</i> (A)    | TGTCGTAGCGGAGGAAGA       |
| ZM2G101769     | <i>ZmJaz12</i> (S)  | CTGATGCTAAGAAGCCTACTCGC  |
|                | <i>ZmJaz12</i> (A)  | GCGTCTGAAGGAGAAGTTTGTA   |
| ZM2G017616     | <i>ZmLOX9</i> (S)   | CATGGCATCAGACTCCTCATC    |
|                | <i>ZmLOX9</i> (A)   | GTAGAGCTGCACATACGACTC    |
| ZM2G118345     | <i>ZmPAL</i> (S)    | TCTGGTCCCCTCTCCTACA      |
|                | <i>ZmPAL</i> (A)    | TTGAAGAAGCCGCCCTCGAT     |
| ZM5G852886     | <i>ZmPR1</i> (S)    | TACGGCGAGAACCTCTTCTG     |
|                | <i>ZmPR1</i> (A)    | GTTGGTGTCGTGGTCGTAGT     |
| ZM2G441541     | <i>ZmRboh D</i> (S) | CCGGCTGCAGACGTTCTT       |
|                | <i>ZmRboh D</i> (A) | CCTGATCCGTGATCTTCGAAA    |
| ZM5G851266     | <i>ZmPPO1</i> (S)   | AGGCGCTACCGGAAGAGAAC     |
|                | <i>ZmPPO1</i> (A)   | GAGAAGTGCACGTGGAACGG     |
| ZM5G811797     | <i>ZmRab7</i> (S)   | TCATCATCCTCGGCGATAGTGG   |
|                | <i>ZmRab7</i> (A)   | AGAGCCTGTCTCGAACTGC      |
| ZM2G326111     | <i>ZmPPI</i> (S)    | ACAAGGGCTCCACCTTCCAC     |
|                | <i>ZmPPI</i> (A)    | TCGTTGCGCACGAACTTCTC     |
| Zm00001d030028 | <i>ZmMYC7</i> (S)   | CGCCAGTAGCAACAGCACC      |
|                | <i>ZmMYC7</i> (A)   | AGCCCTTGAACGGAAACC       |
| Zm00001d043205 | <i>ZmERF147</i> (S) | CGCCAGTAGCAACAGCACC      |
|                | <i>ZmERF147</i> (A) | AGCCCTTGAACGGAAACC       |

|            |                   |                      |
|------------|-------------------|----------------------|
| ZM2G077316 | <i>ZmAOC1</i> (S) | GTACCTGACCTACGAGGAGT |
|            | <i>ZmAOC1</i> (A) | GACGATCTGGTTGAGCTTGA |

\* S: Sense, A: Antisense.
